# Supplementary material for: The role of ferroptosis regulators in the prognosis, immune activity and gemcitabine resistance of pancreatic cancer
Source: PubMed Central journal article supplement — Ann Transl Med. 2020 Nov;8(21):1347. doi: 10.21037/atm-20-2554a (PMC7723621; doi:10.21037/atm-20-2554a), 2020-11
Supplement: atm-08-21-1347-supplementary.pdf [file atm-08-21-1347-supplementary.pdf]

**Table S1** Basic information of the included Gene Expression Omnibus (GEO) datasets

| Study                                                                                                                                            | GEO accession | Publication year | Tumor sample | Normal sample |
|--------------------------------------------------------------------------------------------------------------------------------------------------|---------------|------------------|--------------|---------------|
| Whole-Tissue Gene Expression Study of Pancreatic Ductal Adenocarcinoma                                                                           | GSE15741      | 2009             | 39           | 39            |
| Microarray gene-expression profiles of 69 pancreatic tumors and 61 adjacent non-tumor tissue from patients with pancreatic ductal adenocarcinoma | GSE62452      | 2016             | 69           | 69            |
| Pancreatic Tumor vs Various Tissue Normals                                                                                                       | GSE11838      | 2008             | 28           | 4             |
| Integrative Survival-Based Molecular Profiling of Human Pancreatic Cancer [mRNA]                                                                 | GSE32676      | 2011             | 42           | 7             |
| Combinatorial analysis of miRNA and mRNA expression in pancreatic ductal adenocarcinoma (PDAC)_Mrna                                              | GSE41368      | 2013             | 6            | 6             |
| Gene expression of pancreatic tumors                                                                                                             | GSE43795      | 2013             | 26           | 5             |
| Molecular analysis of precursor lesions in familial pancreatic cancer                                                                            | GSE43288      | 2013             | 34           | 6             |

**Table S2** Activity levels of 29 immune-related pathways in pancreatic cancer

| id                     | Mean level |
|------------------------|------------|
| aDCs                   | 0.423455   |
| APC_co_inhibition      | 0.526804   |
| APC_co_stimulation     | 0.398148   |
| B_cells                | 0.351248   |
| CCR                    | 0.456014   |
| CD8+_T_cells           | 0.461524   |
| Check-point            | 0.407763   |
| Cytolytic_activity     | 0.547714   |
| DCs                    | 0.450642   |
| HLA                    | 0.861894   |
| iDCs                   | 0.301289   |
| Inflammation-promoting | 0.46859    |
| Macrophages            | 0.614004   |
| Mast_cells             | 0.401765   |
| MHC_class_I            | 0.967318   |
| Neutrophils            | 0.532509   |
| NK_cells               | 0.182109   |
| Parainflammation       | 0.728432   |
| pDCs                   | 0.406689   |
| T_cell_co-inhibition   | 0.325036   |
| T_cell_co-stimulation  | 0.33536    |
| T_helper_cells         | 0.777595   |
| Tfh                    | 0.302339   |
| Th1_cells              | 0.238486   |
| Th2_cells              | 0.273066   |
| TIL                    | 0.488722   |
| Treg                   | 0.608353   |
| Type_I_IFN_Reponse     | 0.638098   |
| Type_II_IFN_Reponse    | 0.567161   |

**Table S3** Changes in the expression levels of ferroptosis regulators in gemcitabine-resistant pancreatic cancer cells

| Gene_Name  | P_VAL  | logF2 |
|------------|--------|-------|
| ACSL4      | 0.5887 | 0.165 |
| ATP5G3     | 0.235  | 0.377 |
| CARS       | 0.19   | 0.47  |
| CBS        | 0.12   | 1.8   |
| CHAC1      | 0.019  | 1.83  |
| CISD1      | 0.079  | 0.64  |
| CS         | 0.046  | 0.82  |
| DPP4       | 0.37   | -0.61 |
| FANCD2     | 0.06   | 1     |
| GCLC       | 0.11   | 0.6   |
| GCLM       | 0.027  | 2.02  |
| GLS2       | 0.32   | -0.95 |
| GPX4       | 0.92   | 0.03  |
| GSS        | 0.68   | 0.15  |
| HMGCR      | 0.31   | 0.6   |
| HSPB1      | 0.1    | -0.68 |
| HSPB5      | \      |       |
| LPCAT3     | 0.47   | -0.32 |
| MT1G       | \      |       |
| NCOA4      | 0.8    | 0.09  |
| NFE2L2     | 0.52   | 0.26  |
| PTGS2      | 0.11   | -1.14 |
| RPL8       | \      |       |
| SAT1       | 0.02   | -1.6  |
| SLC7A11    | 0.017  | 3.27  |
| SQS        | \      |       |
| TP53       | 0.95   | -0.02 |
| TFRC       | 0.09   | 1.15  |
| EMC2       | \      |       |
| AIFM2      | 0.08   | 1.26  |
| OSGIN1     | 1.99   | 0.45  |
| SLC3A2     | 0.019  | 1.61  |
| NQO1       | 0.47   | 0.36  |
| PIR        | 0.06   | 1.05  |
| FXD3       | 0.02   | -1.64 |
| TMEM87A    | 0.31   | -1.34 |
| ST6GALNAC2 | 0.21   | -0.79 |
| ALDH3A2    | 0.31   | 0.33  |
| PERP       | 0.06   | -1.08 |
| HES1       | 0.037  | -1.21 |
| DBN1       | 0.09   | 0.68  |
| PKIA       | 0.17   | 1.008 |
| WASF1      | 0.46   | -0.22 |
| GLS1       | \      |       |

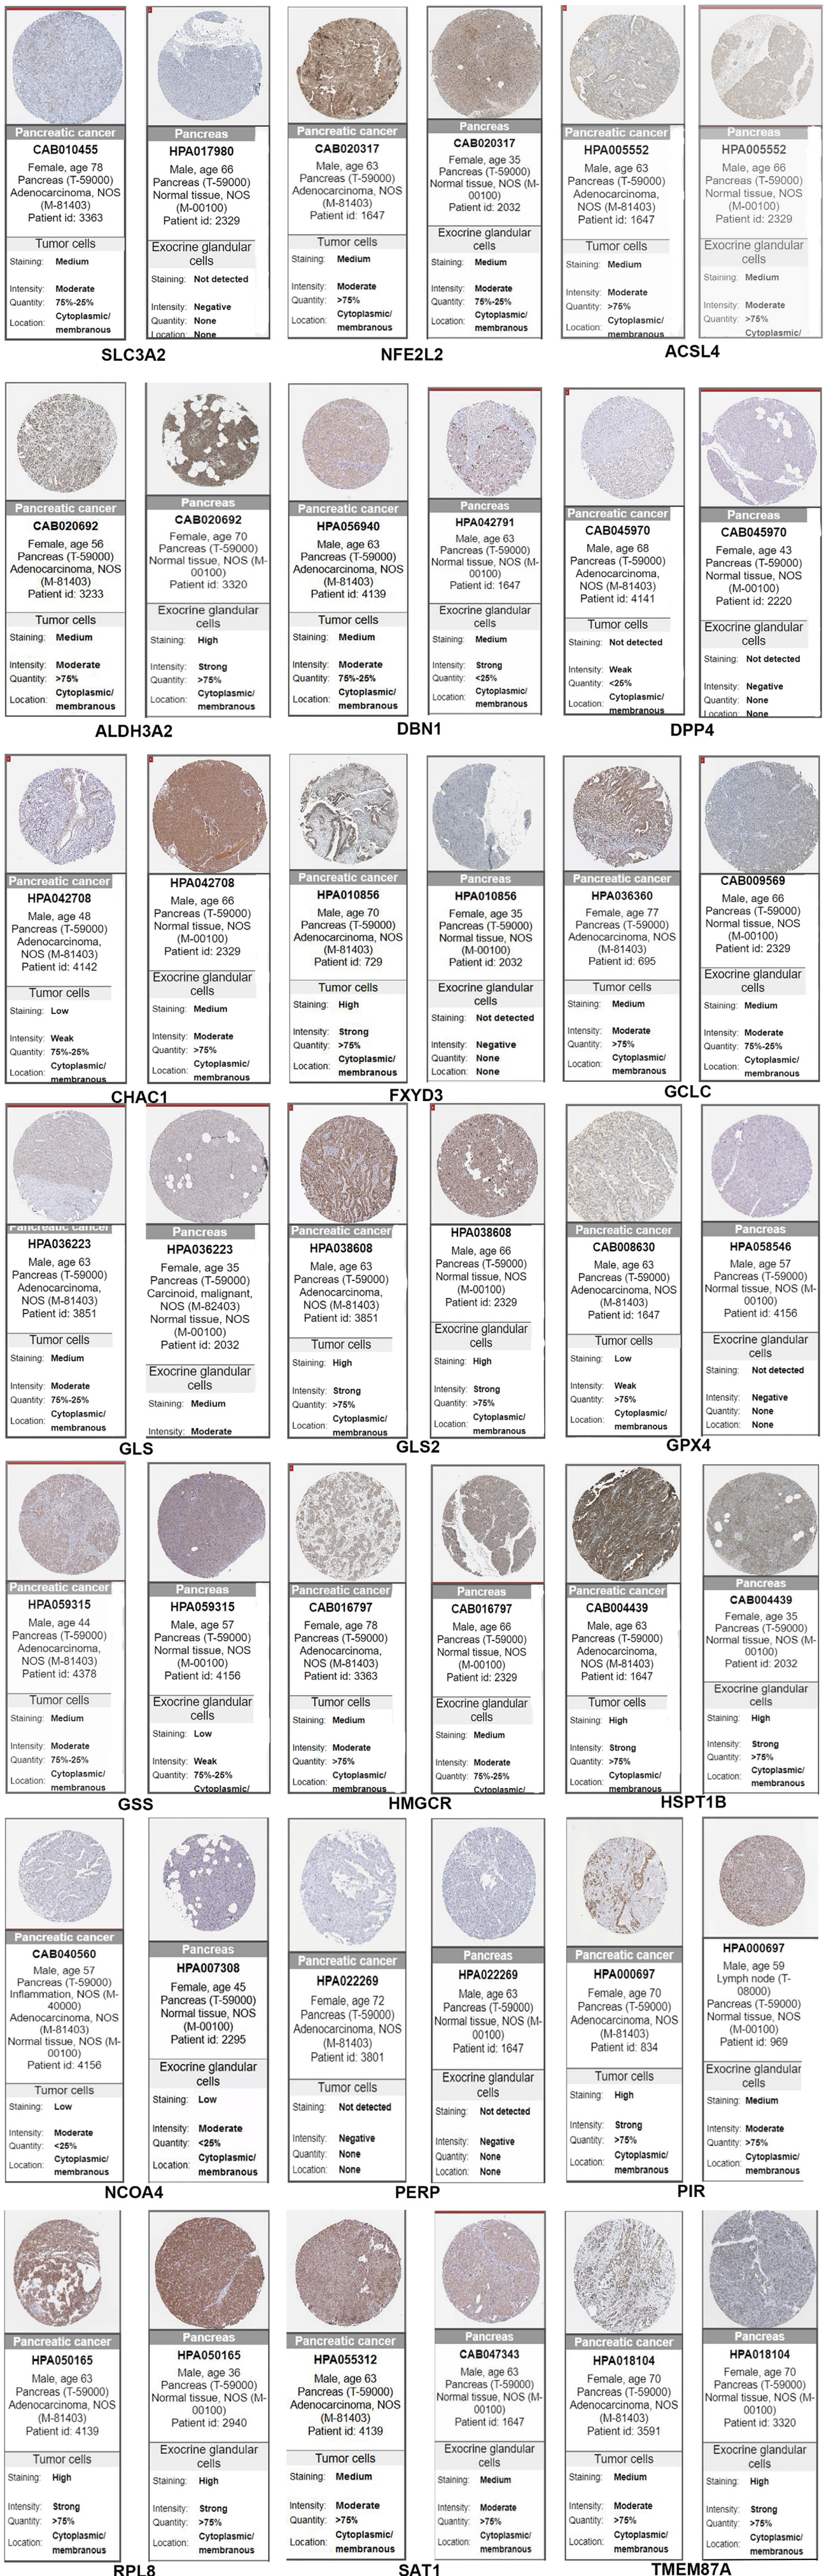

Figure S1 Immunohistochemical presentation of the 43 ferroptosis regulators in pancreatic cancer.

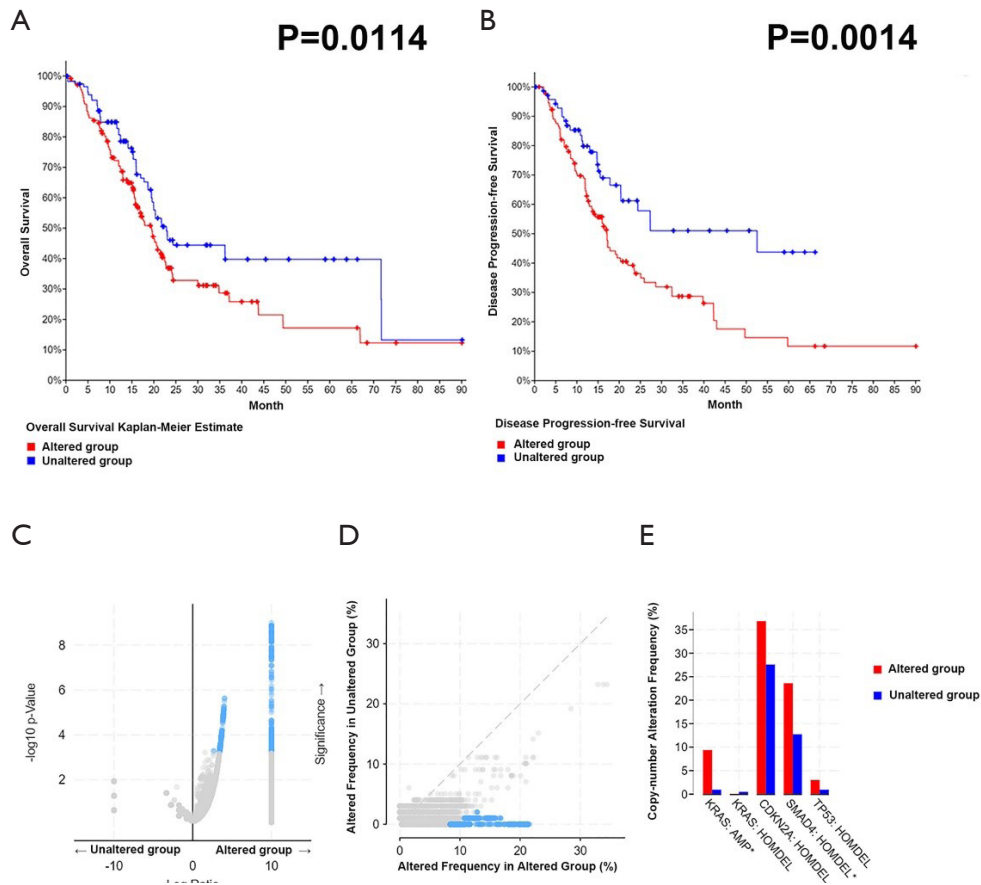

**Figure S2** Analysis of the role of copy number alterations in ferroptosis regulators in pancreatic cancer. (A) Patients without copy number alterations in ferroptosis regulators had longer overall survival times; (B) patients without copy number alterations in ferroptosis regulators had longer disease-free survival times; (C,D) the frequency of copy number alterations in ferroptosis regulators dictated copy number alterations in other genes; (E) the four driver genes of pancreatic cancer were altered more frequently in samples harboring mutations in ferroptosis regulators.

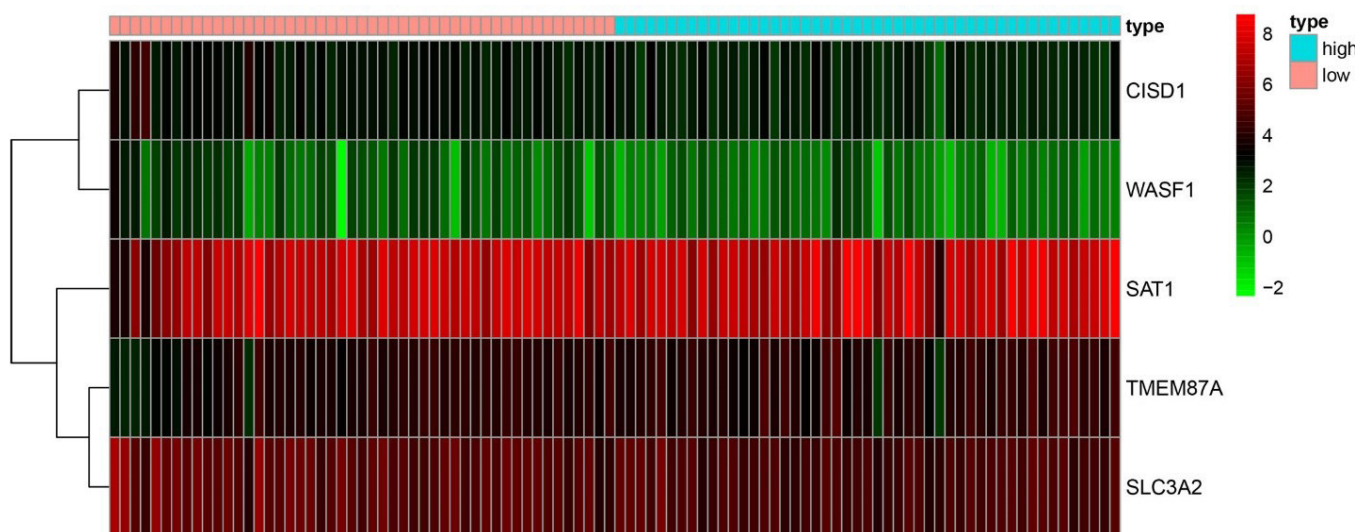

**Figure S3** Five ferroptosis regulators were included in the construction of the prognostic model.

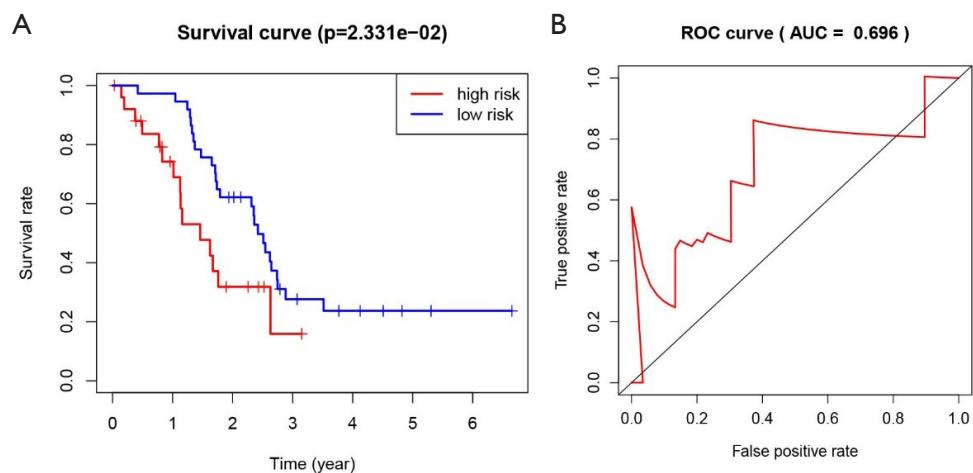

**Figure S4** Validation for the accuracy of the predictive model with a Gene Expression Omnibus (GEO) dataset. (A) The survival curve shows a significant difference between the high- and low-risk groups in the GEO validation cohort stratified using our prognostic model in terms of the survival outcome; (B) the receiver operating characteristic (ROC) curve shows the good accuracy of our model for predicting pancreatic cancer survival in the GEO validation cohort.

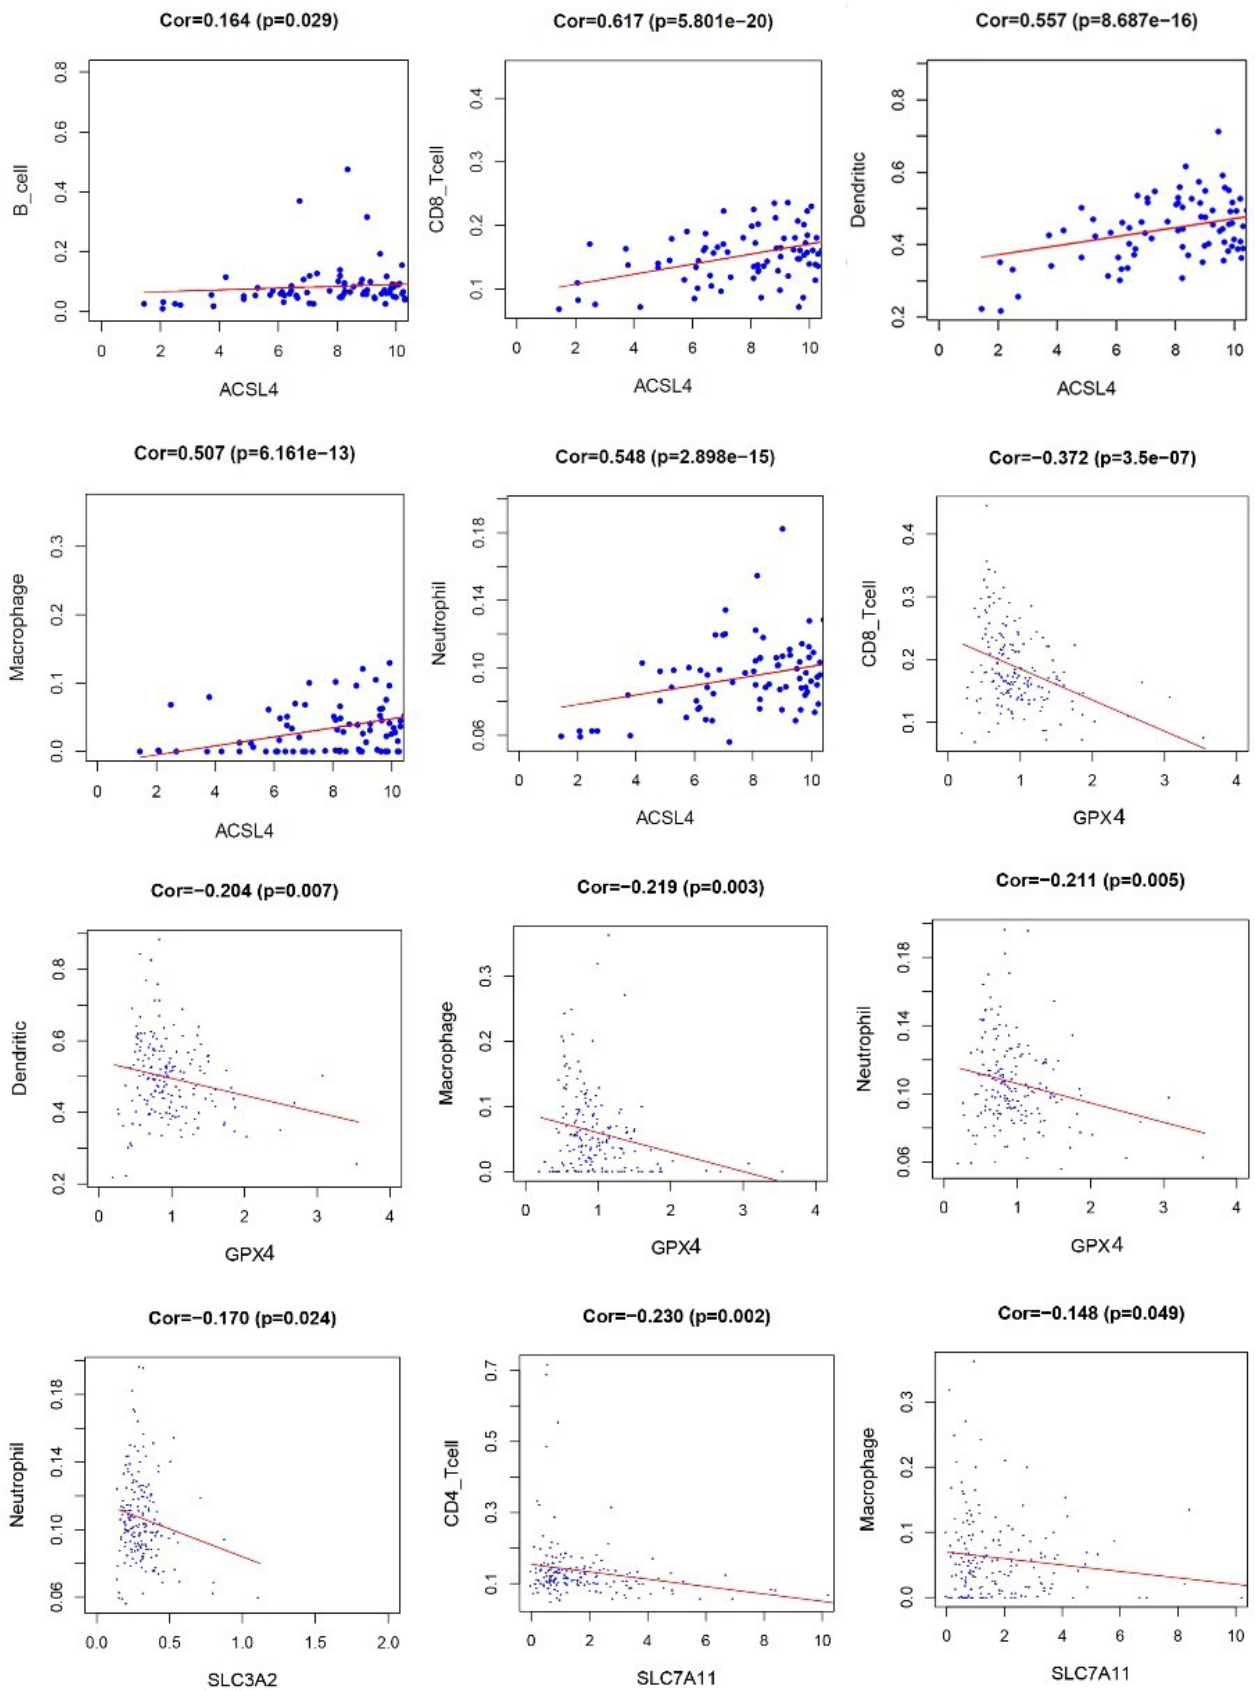

**Figure S5** Correlations between key ferroptosis regulators and infiltrating immune cells.

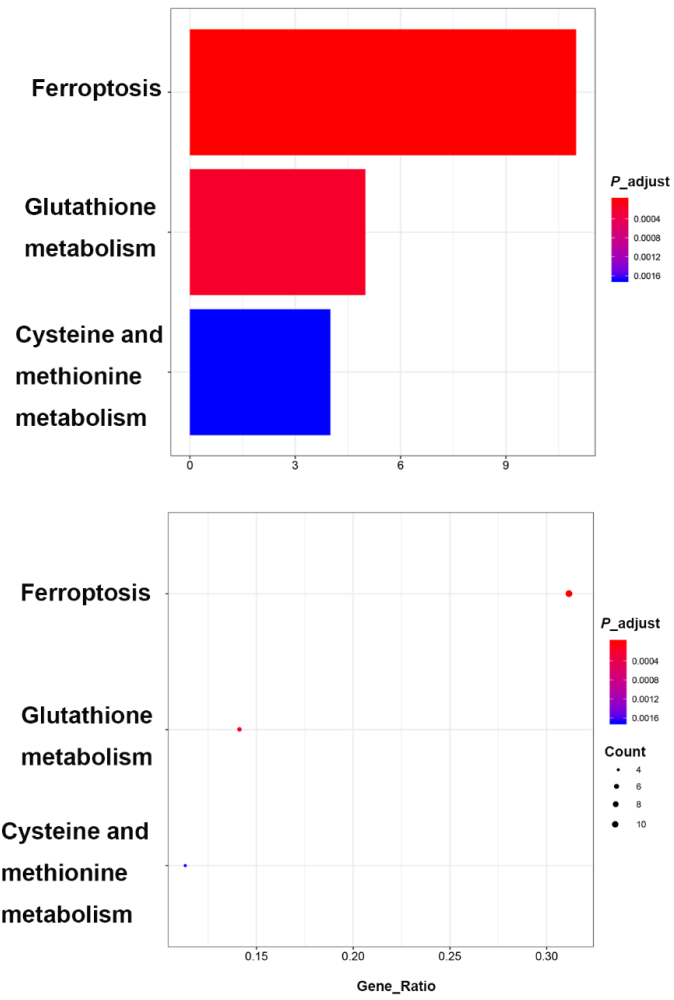

Figure S6 KEGG analyses of the 43 ferroptosis regulators.
